# Supplementary material
Source: PubMed Central journal article supplement (PMC5884693)

A

|            |    |                                                                            |     |     |                                                       |
|------------|----|----------------------------------------------------------------------------|-----|-----|-------------------------------------------------------|
| ty3_gag    | 1  | -----SFMDQIPGGCNYPKLPVCLPNPQIPQSLTFR                                       | CRN | 121 | EAKLG--ERL--NQRF--KIW-----DRMPFF--MT--KAAIMTY         |
| Tc_gypsy   | 1  | -----FIATSLNKKYFNVDANDF--ONTLLEKSKXNI--KCPAAAHIASY                         | 17  | 95  | CGNLIPLEP--TRTQENLN--QISYISTQVVUTARDALIQ--NSNHLF--RVF |
| Dm_gypsy1  | 1  | -----EAPPIKIVYKPVDTITGLVR--CDETL--AVK                                      | 119 | 96  | CGSLTLQYDEVEK--LT--TNKATMSYEASA--KVLCE--KFRDDA--RVF   |
| Sc_ARC2    | 1  | -----KSKGCFSTAN--CPTFR--COR                                                | 98  | 98  | CGDS--QIDF--ICN--KAAI--KRP--EGR--HDL--CE--DFI         |
| Dm_ARC2    | 1  | -----GTSFN--CTVR--COR                                                      | 95  | 95  | CGSYDVIDS--ICKO--KAAI--KRP--EGR--HDL--CE--DFI         |
| Ds_ARC2    | 1  | -----GTSFN--CAVR--COR                                                      | 95  | 95  | CAHGVIDS--VCKO--KAAI--KRP--EGR--HDL--CE--DFI          |
| Dm_ARC1    | 1  | -----CNFSA--CTHS--COR                                                      | 95  | 95  | DDHDPIDT--VIOK--KAAI--KRP--EGR--HDL--CE--DFI          |
| Ds_ARC1    | 1  | -----GTSFAA--CTHN--COR                                                     | 95  | 95  | EDHHDH--VVR--KAAI--KRP--EGR--HDL--CE--DFI             |
| Sc_ARC1    | 1  | -----GTSFN--CSSR--COR                                                      | 95  | 95  | DESTAD--VCKO--KAAI--KRP--EGR--HDL--CE--DFI            |
| Lh_gypsy11 | 1  | -----CNFSR--CTSR--COR                                                      | 94  | 94  | CEWTSQDV--ICNA--KAAI--KRP--EGR--HDL--CE--DFI          |
| Dm_gypsy   | 1  | -----FVHKPTPIKL--CTSR--COR                                                 | 89  | 89  | CEH--OETH--ICNA--KAAI--KRP--EGR--HDL--CE--DFI         |
| Dr_gypsy26 | 1  | -----FVHKPTPIKL--CTSR--COR                                                 | 89  | 89  | GVDE--SRT--AYOY--KATC--LRN--KPS--MT--KRI--QAA         |
| Cc_gypsy   | 1  | -----FVKL--DFPS--STQ                                                       | 93  | 93  | CGAR--SRT--APHY--KATC--LRN--KPS--MT--KRI--QAA         |
| Ac_ARC     | 1  | -----PNVSUSEDA--PASFVE--TOV                                                | 97  | 97  | CKGC--PDDO--LWRK--KDY--OTYV--ADL--EIIQYV              |
| Hs_ARC     | 1  | GELPGQEPAAEQYQPNVFCEDGQ--PSPGV--TOI                                        | 112 | 112 | CKQC--PDDO--LWRK--KDY--OTYV--ADL--EIIQYV              |
| Mm_ARC     | 1  | GELPEQESVEAQYQSNVFCEDGQ--PSPGV--TOI                                        | 112 | 112 | CKGC--PDDO--LWRK--KDY--OTYV--ADL--EIIQYV              |
| Lc_gypsy   | 1  | GELPEQESVEAQYQSNVFCEDGQ--PSPGV--TOI                                        | 95  | 95  | CGSC--PDDO--LWRK--KDY--OTYV--ADL--EIIQYV              |
| Lc_gypsy2  | 1  | -----INSCAGA--PIPE--EST                                                    | 77  | 77  | CGPC--DIDS--VLN--WETI--RR--HPT--ADL--EIIQYV           |
| ty3_gag    | 36 | DSHKLK--SEIMLNMSHISWPN--ASRIVYCRRL--LNP--A--ANDFVQ                         | 155 | 155 | TR--TKETYNIVRMHKPE--LKDAMEZAYQTTALTERFFFCFELDADGDTI   |
| Tc_gypsy   | 17 | FIATSLNKKYFNVDANDF--ONTLLEKSKXNI--KCPAAAHIASY                              | 143 | 143 | LKO--NNPLGDT--STROPASLGDA--RI--                       |
| Dm_gypsy1  | 28 | -----CFPD--NGTQ--V--SWRQ--ANAAHYHFRKYEDSSRHQAVVI                           | 167 | 167 | VSG--RNHLDV--FAAKP--DMPSA--DAL--                      |
| Sc_ARC2    | 18 | DHDAV--DAV--TKEVEG--SDKDA--KGLSLEF--NG--L--T--MKG--                        | 133 | 133 | YGL--SLY--QOIP--HEI--SRD--LDR--                       |
| Dm_ARC2    | 15 | DHDAV--DAV--TKEVEG--SDKDA--KGLSLEF--KSI--V--V--MKG--                       | 130 | 130 | YGL--MOP--YRESIP--HEI--SRD--LDR--                     |
| Ds_ARC2    | 15 | DHDAV--DAV--TKEVEG--SDKDA--KGLSLEF--KSI--V--V--MKG--                       | 130 | 130 | YGL--MOP--YRESIP--HEI--SRD--LDR--                     |
| Dm_ARC1    | 15 | DHDAV--DAV--TKEVEG--SDKDA--KGLSLEF--KSI--V--V--MKG--                       | 130 | 130 | YGL--MOP--YRESIP--HEI--SRD--LDR--                     |
| Ds_ARC1    | 15 | DHDAV--DAV--TKEVEG--SDKDA--KGLSLEF--KSI--V--V--MKG--                       | 130 | 130 | YGL--MOP--YRESIP--HEI--SRD--LDR--                     |
| Lh_gypsy11 | 15 | DHDAV--DAV--TKEVEG--SDKDA--KGLSLEF--KSI--V--V--MKG--                       | 130 | 130 | YGL--MOP--YRESIP--HEI--SRD--LDR--                     |
| Dm_gypsy   | 10 | NAIVEA--DAIV--TKEVEG--SDKDA--KGLSLEF--KSI--V--V--MKG--                     | 130 | 130 | YGL--MOP--YRESIP--HEI--SRD--LDR--                     |
| Dr_gypsy26 | 20 | EDP--PIT--ELER--CDE--LAV--QPL--NDSEI--SHLPSV--L--TH--K--D--W--AE--         | 123 | 123 | YGL--MOP--YRESIP--HEI--SRD--LDR--                     |
| Cc_gypsy   | 14 | EDP--PIT--ELER--CDE--LAV--QPL--NDSEI--SHLPSV--L--TH--K--D--W--AE--         | 123 | 123 | YGL--MOP--YRESIP--HEI--SRD--LDR--                     |
| Ac_ARC     | 19 | FED--PR--L--SHL--EL--KQVGG--SEIY--SO--Q--NM--N--K--P--K--K--W--EYK--       | 131 | 131 | VGT--OP--L--K--R--F--R--H--P--L--K--L--E--O--I--R--   |
| Hs_ARC     | 34 | FED--PR--L--SHL--EL--KQVGG--SEIY--SO--Q--NM--N--K--P--K--K--W--EYK--       | 146 | 146 | VGT--OP--L--K--R--F--R--H--P--L--K--L--E--O--I--R--   |
| Mm_ARC     | 34 | FED--PR--L--SHL--EL--KQVGG--SEIY--SO--Q--NM--N--K--P--K--K--W--EYK--       | 146 | 146 | VGT--OP--L--K--R--F--R--H--P--L--K--L--E--O--I--R--   |
| Lc_gypsy   | 17 | KRP--PK--Y--GE--P--RAL--Q--CSL--PESY--SO--Q--NM--N--K--P--K--K--W--EYK--   | 129 | 129 | VEV--R--P--L--K--R--F--R--H--P--L--K--L--E--O--I--R-- |
| Lc_gypsy2  | 1  | -----DAK--EL--FK--L--RAL--Q--CSL--PESY--SO--Q--NM--N--K--P--K--K--W--EYK-- | 111 | 111 | ZEVD--P--L--K--R--F--R--H--P--L--K--L--E--O--I--R--   |
| ty3_gag    | 84 | EQGILE-----IG--EDT--F--IOGLYQH--YKFPDINK--FNAYTOLS                         | 205 | 205 | IG-----                                               |
| Tc_gypsy   | 62 | -----QIT--N--NDLKTALLATYADKRDLOTETI--CNLR                                  |     |     |                                                       |
| Dm_gypsy1  | 69 | IRSKV--GPADAVLSSFGTVLNF--DAIISRLDFTYSDKRI--IHV--EQ--GTLR                   |     |     |                                                       |
| Sc_ARC2    | 63 | RRKAT--R--DEANVLLREH--SP--R--EAYQVYL--IFETK                                |     |     |                                                       |
| Dm_ARC2    | 60 | RRDA--R--SDALQLLRDH--SP--R--EAYQVYL--IFETK                                 |     |     |                                                       |
| Ds_ARC2    | 60 | RRDA--R--SDALQLLRDH--SP--R--EAYQVYL--IFETK                                 |     |     |                                                       |
| Dm_ARC1    | 60 | RRDA--R--SDALQLLRDH--SP--R--EAYQVYL--IFETK                                 |     |     |                                                       |
| Ds_ARC1    | 60 | RRDA--R--SDALQLLRDH--SP--R--EAYQVYL--IFETK                                 |     |     |                                                       |
| Lh_gypsy11 | 59 | KSTV--R--NEAIALIREH--SP--R--EAYQVYL--IFETK                                 |     |     |                                                       |
| Dr_gypsy26 | 54 | KOTI--R--NEAIALIREH--SP--R--EAYQVYL--IFETK                                 |     |     |                                                       |
| Cc_gypsy   | 64 | KRRVR--R--NEAIALIREH--SP--R--EAYQVYL--IFETK                                |     |     |                                                       |
| Ac_ARC     | 58 | RRNVQ--R--NEAIALIREH--SP--R--EAYQVYL--IFETK                                |     |     |                                                       |
| Hs_ARC     | 63 | ODSV--R--NEAIALIREH--SP--R--EAYQVYL--IFETK                                 |     |     |                                                       |
| Mm_ARC     | 78 | QGSV--R--NEAIALIREH--SP--R--EAYQVYL--IFETK                                 |     |     |                                                       |
| Lc_gypsy   | 61 | GSIT--R--NEAIALIREH--SP--R--EAYQVYL--IFETK                                 |     |     |                                                       |
| Lc_gypsy2  | 43 | AVQLE--R--NEAIALIREH--SP--R--EAYQVYL--IFETK                                |     |     |                                                       |

B

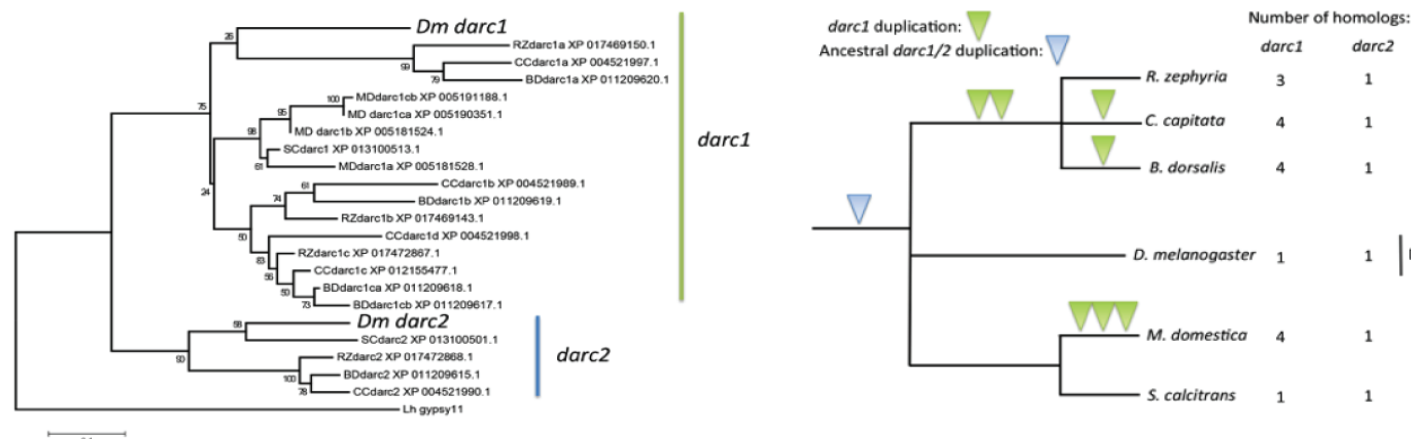

Supplement: NIHMS930138-supplement-1.pdf [file NIHMS930138-supplement-1.pdf]
