# Supplementary material
Source: PubMed Central journal article supplement (PMC5884693)
Supplement: NIHMS930138-supplement-8.pdf [file NIHMS930138-supplement-8.pdf]

**Table S1: Related to the STAR Methods**

| <b>Oligonucleotide Pair</b> | <b>Forward (5'-&gt; 3')</b>        | <b>Reverse (5'-&gt; 3')</b>       |
|-----------------------------|------------------------------------|-----------------------------------|
| Arc                         | GGAGGGAGGTCTTCTACCGTC              | CCCCCACACCTACAGAGACA              |
| GFP                         | CCTGAAGTTCATCTGCACCA               | AAGTCGTGCTGCTTCATGTG              |
| GST                         | TGGAGTTTCCCAATCTTCCTT              | ACGCTCTTTTGGACAACCAC              |
| GAPDH                       | CATGGCCTTCCGTGTTCTTA               | GCCTGCTTCACCACCTTCTT              |
| AsnA                        | GCGTGGATGCCGACACGTTG               | ATACCGCCGCCGATGGTCTG              |
| Arc $\Delta$ CTD            | CCCACAGAGGATGAGACTGAGGCA<br>CTCACG | ACCCTCACTGTACTGCAGAACTC<br>CTTCTT |
