# Supplementary material
Source: PubMed Central journal article supplement (PMC5884693)

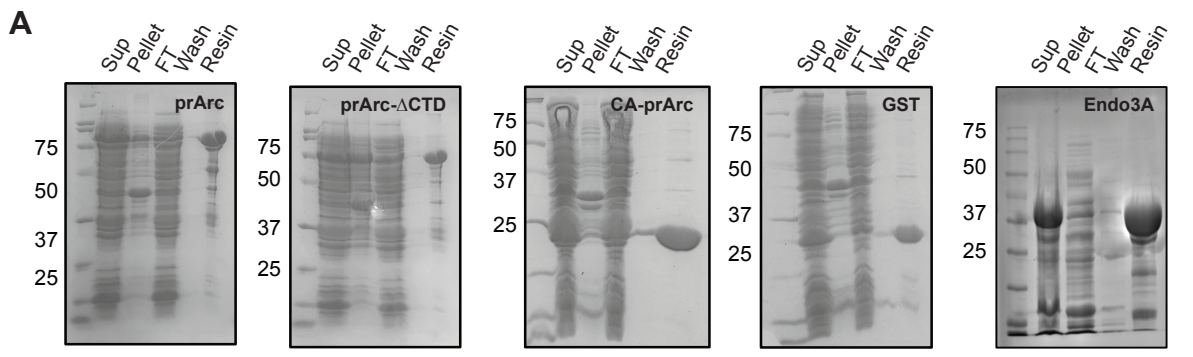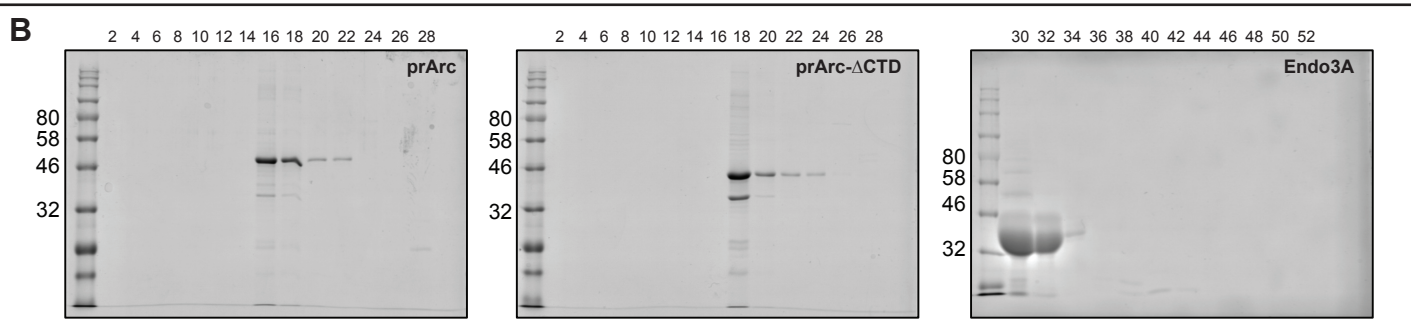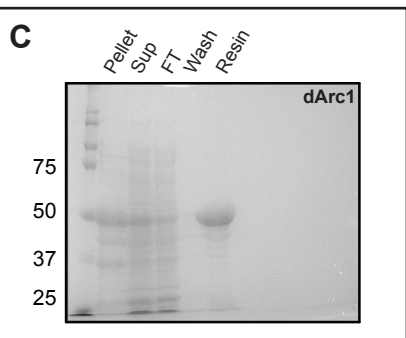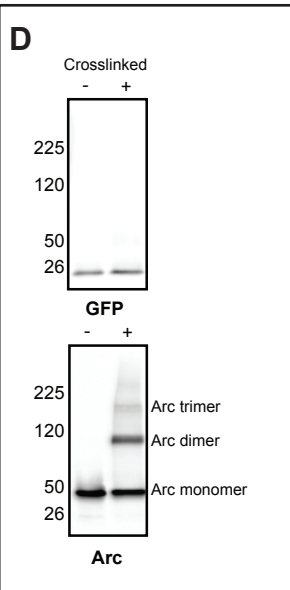

Supplement: NIHMS930138-supplement-2.pdf [file NIHMS930138-supplement-2.pdf]

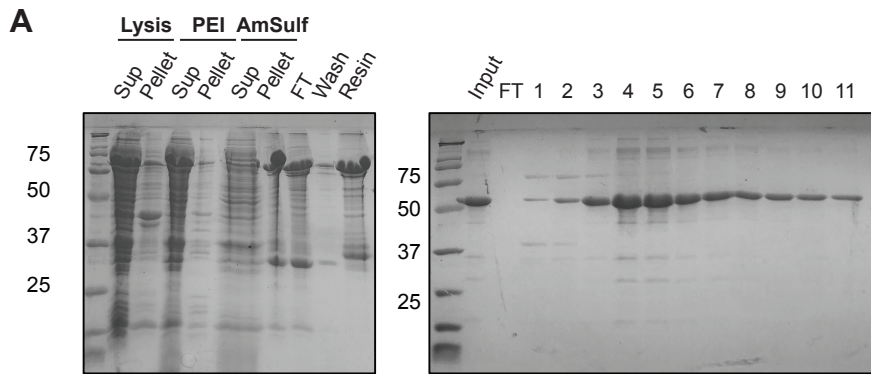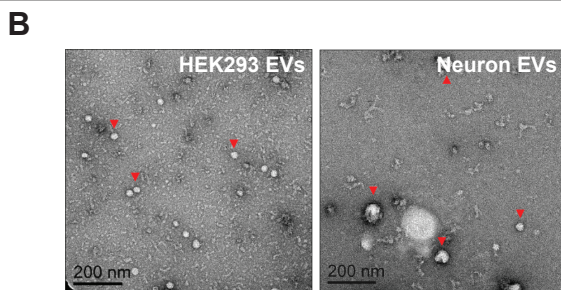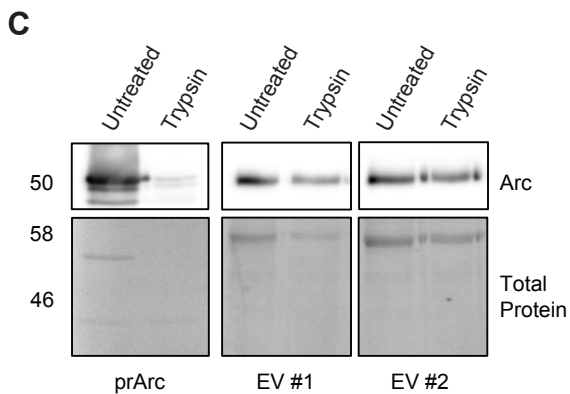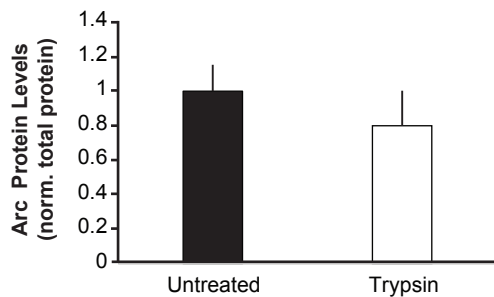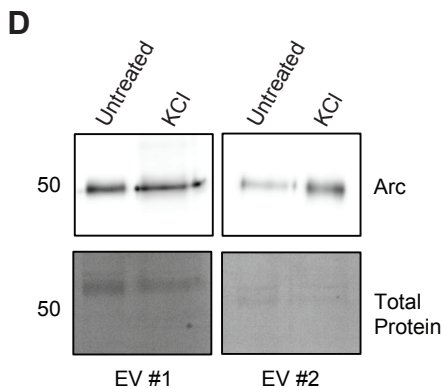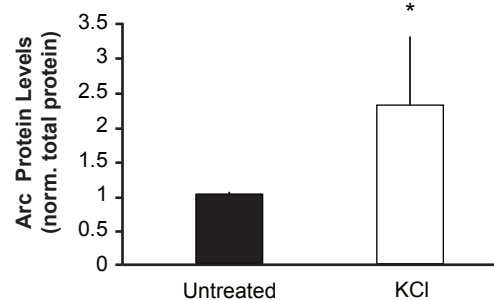

Supplement: NIHMS930138-supplement-3.pdf [file NIHMS930138-supplement-3.pdf]

### A Transferred (Recipient ) Cells

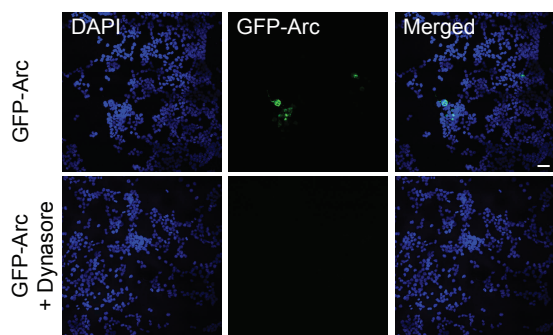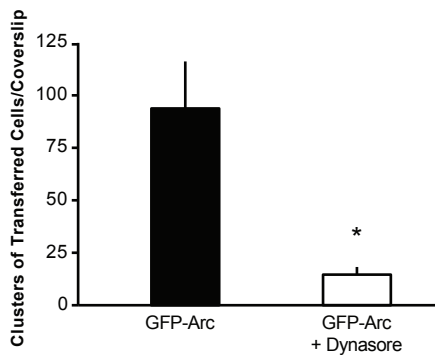

### B

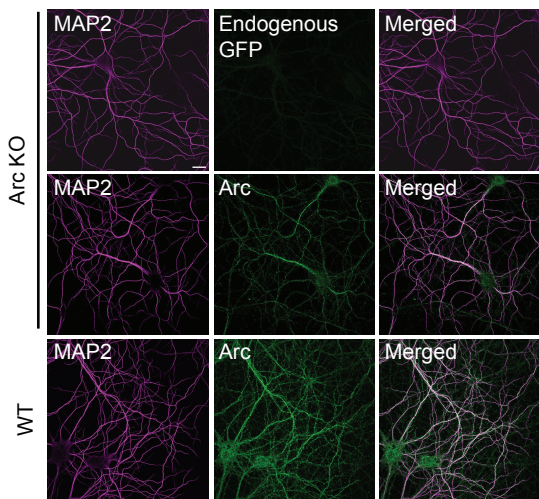

### C

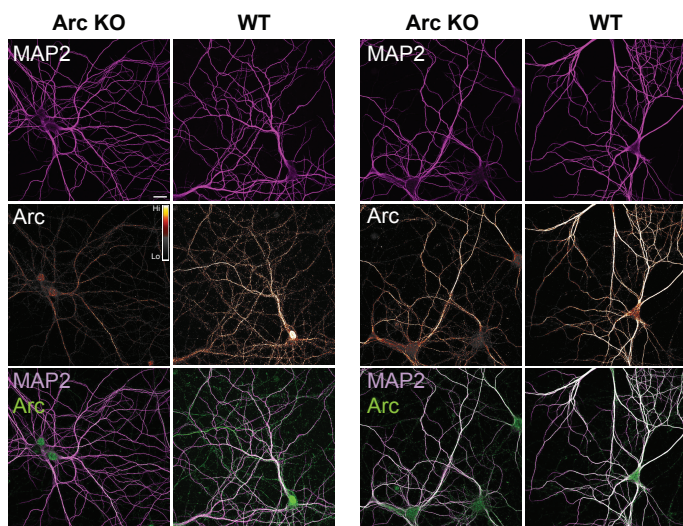

Custom                      Synaptic Systems

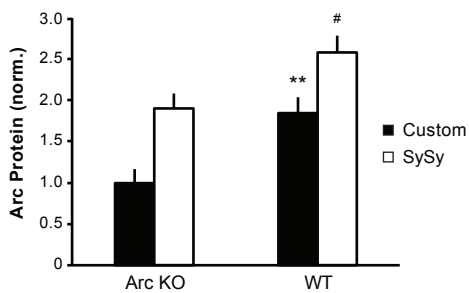

Supplement: NIHMS930138-supplement-4.pdf [file NIHMS930138-supplement-4.pdf]

**A**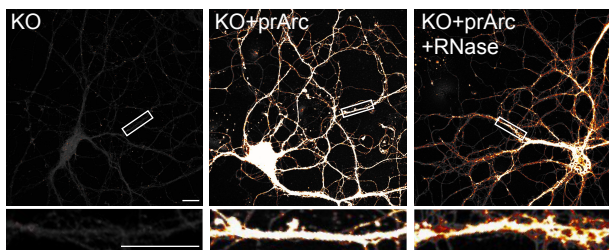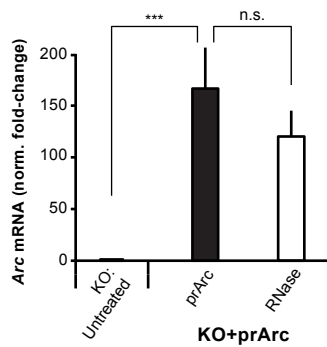**B**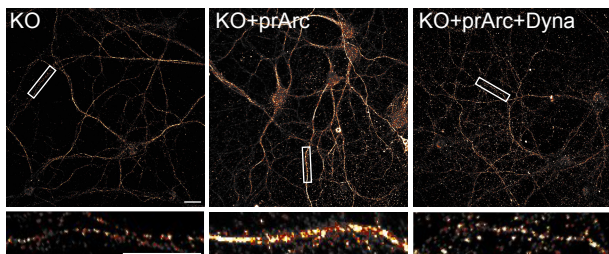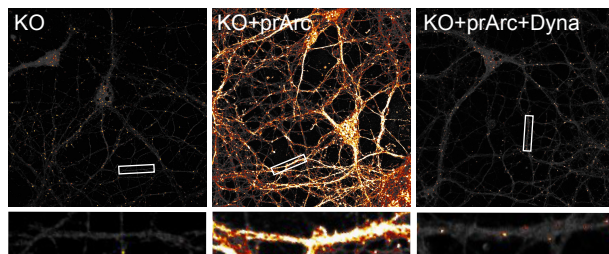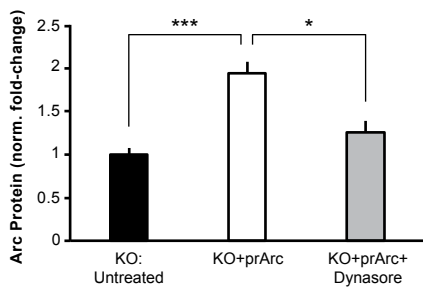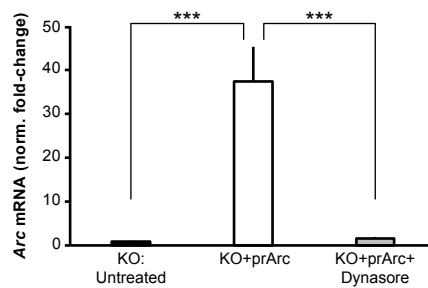**C**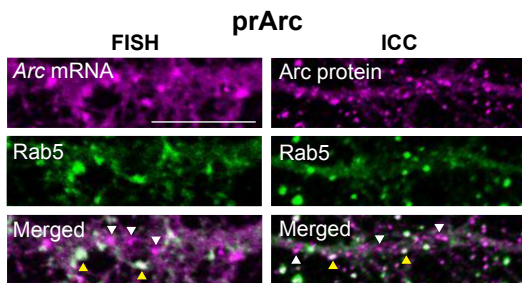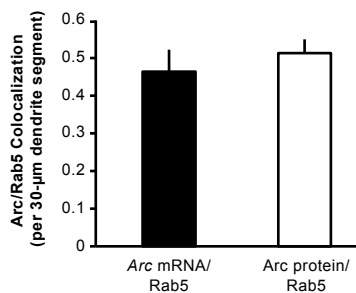**D**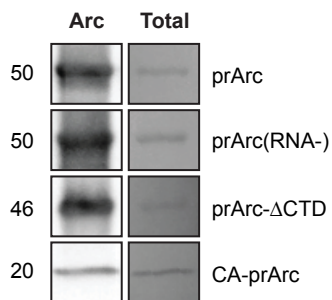

Supplement: NIHMS930138-supplement-5.pdf [file NIHMS930138-supplement-5.pdf]

KO  
Untreated

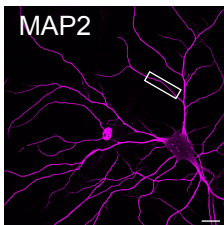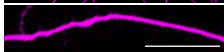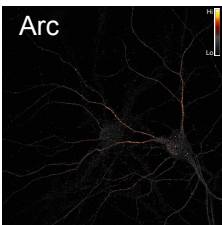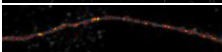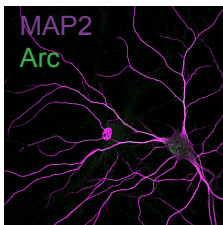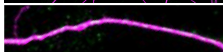

KO + prArc

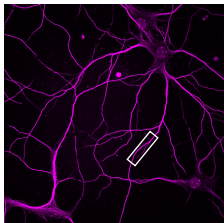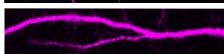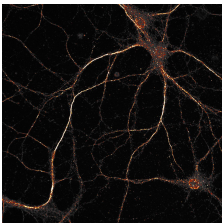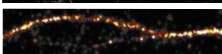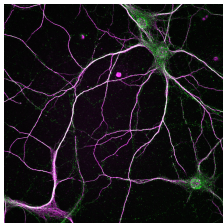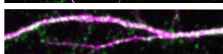

KO + prArc  
Non-permeabilized

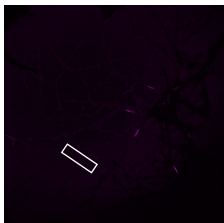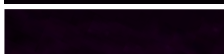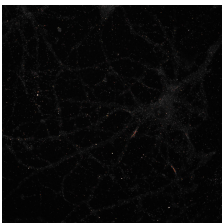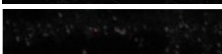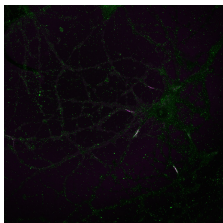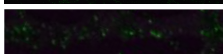

KO + prArc (RNA-)

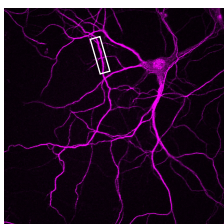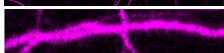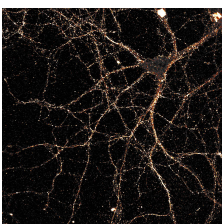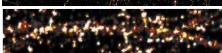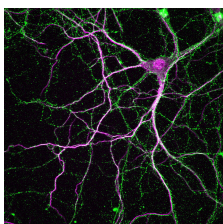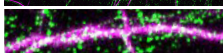

KO + prArc (RNA-)  
Non-permeabilized

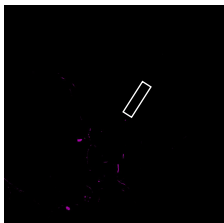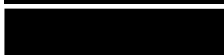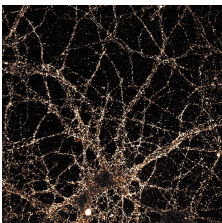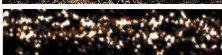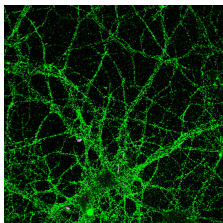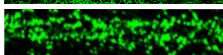

Supplement: NIHMS930138-supplement-6.pdf [file NIHMS930138-supplement-6.pdf]

Figure S7

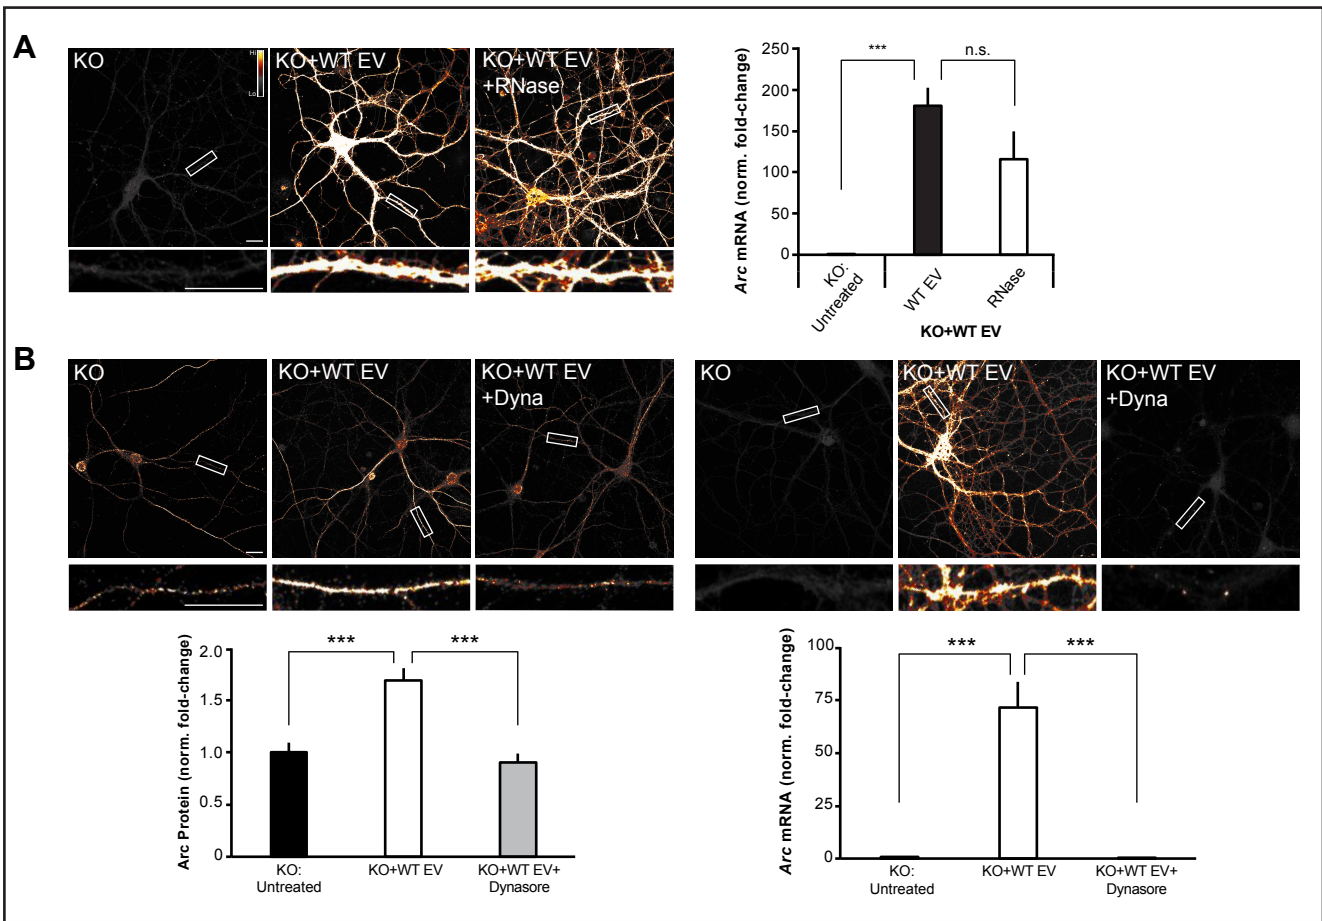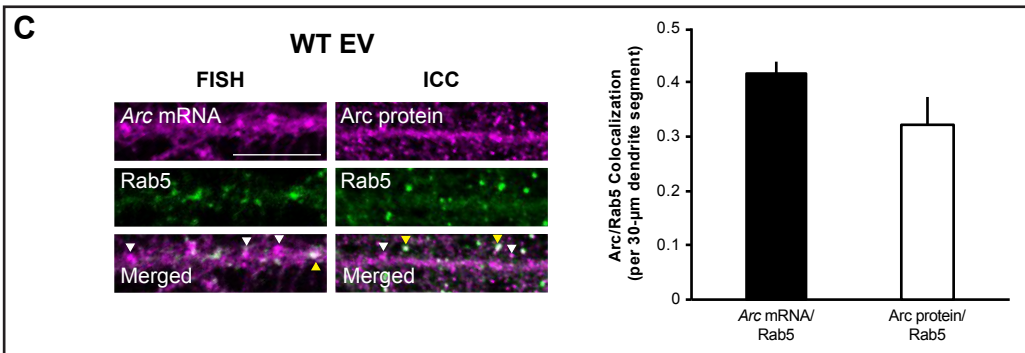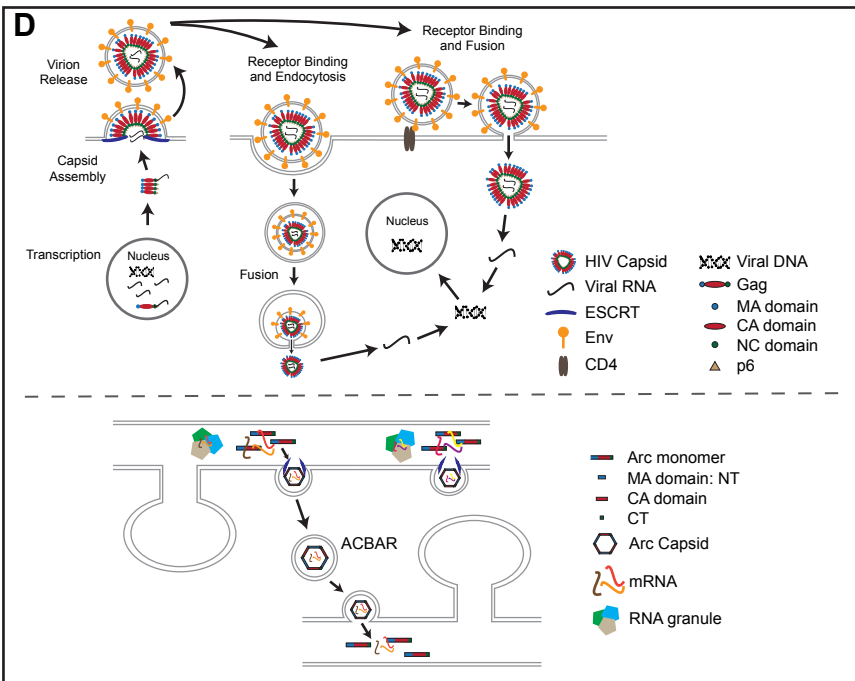

Supplement: NIHMS930138-supplement-7.pdf [file NIHMS930138-supplement-7.pdf]
